# Supplementary material for: Confirmation of a non-synonymous SNP in PNPLA8 as a candidate causal mutation for Weaver syndrome in Brown Swiss cattle
Source: Genet Sel Evol. 2016 Mar 18;48:21. doi: 10.1186/s12711-016-0201-5 (PMC4797220; doi:10.1186/s12711-016-0201-5)
Supplement: Supplementary file 3 — 10.1186/s12711-016-0201-5 Genotype distribution of 41 candidate causal mutations for Weaver syndrome in 1147 animals. The distribution of the genotypes of 41 candidate causal mutations (McClure et al. [23]) for Weaver syndrome in 1147 animals sequenced in the course of the 1000 bull genomes project was analyzed. The sequenced animals were grouped by breed. Numbers represent the within-breed frequency of the alternative allele. The distribution of genotypes for each breed is given in parentheses (homozygous animals for the reference allele | heterozygous animals | homozygous animals for the alternative allele). The grey background indicates candidate causal variations within the 1.72-Mb segment of extended homozygosity. Blue color indicates two variants that were perfectly associated with the Weaver status of 1147 sequenced animals. However, only one compatible variant (rs800397662, Chr4:49,878,773 bp) is located within the segment of extended homozygosity. [file 12711_2016_201_MOESM3_ESM.xlsx]

## Sheet: weaver_summary.csv
Candidate causal variant	Position on chromosome 4	Reference allele	Alternate allele	Animals sequenced per breed (number)a
				HOL (288)	FV (142)	ANG (121)	SIM (77)	JER (61)	BSW (59)	GV (34)	CHA (33)	LIM (32)	HER (31)	GCOM (30)	BBO (29)	ACO (28)	MON (28)	AYR (25)	NOR (24)	RED (23)	ANG_R (17)	RDC (16)	DANR (15)	BBL (10)	COM (9)	PIE (5)	ERI (2)	GAL (2)	High (2)	ROM (1)	SAL (1)	TYR (1)	unkn (1)
1	49651768	A	G	0 (288|0|0)	0.0775 (120|22|0)	0 (121|0|0)	0.1104 (60|17|0)	0 (61|0|0)	0.0169 (57|2|0)	0.0147 (33|1|0)	0.0152 (32|1|0)	0.0156 (31|1|0)	0 (31|0|0)	0 (30|0|0)	0.069 (25|4|0)	0 (28|0|0)	0.0179 (27|1|0)	0 (25|0|0)	0 (24|0|0)	0 (23|0|0)	0 (17|0|0)	0 (16|0|0)	0.2333 (10|3|2)	0 (10|0|0)	0 (9|0|0)	0 (5|0|0)	0 (2|0|0)	0 (2|0|0)	0 (2|0|0)	0 (1|0|0)	0 (1|0|0)	0 (1|0|0)	0 (1|0|0)
2	49656945	C	T	0 (288|0|0)	0.0775 (120|22|0)	0 (121|0|0)	0.1104 (60|17|0)	0 (61|0|0)	0.0169 (57|2|0)	0.0147 (33|1|0)	0.0152 (32|1|0)	0.0156 (31|1|0)	0 (31|0|0)	0 (30|0|0)	0.069 (25|4|0)	0 (28|0|0)	0.0357 (27|0|1)	0 (25|0|0)	0 (24|0|0)	0 (23|0|0)	0 (17|0|0)	0 (16|0|0)	0.2333 (10|3|2)	0 (10|0|0)	0 (9|0|0)	0 (5|0|0)	0 (2|0|0)	0 (2|0|0)	0 (2|0|0)	0 (1|0|0)	0 (1|0|0)	0 (1|0|0)	0 (1|0|0)
3	49657798	G	A	0 (288|0|0)	0.0775 (120|22|0)	0 (121|0|0)	0.1104 (60|17|0)	0 (61|0|0)	0.0169 (57|2|0)	0.0147 (33|1|0)	0.0152 (32|1|0)	0.0156 (31|1|0)	0 (31|0|0)	0 (30|0|0)	0.069 (25|4|0)	0 (28|0|0)	0.0179 (27|1|0)	0 (25|0|0)	0 (24|0|0)	0 (23|0|0)	0 (17|0|0)	0 (16|0|0)	0.2333 (10|3|2)	0 (10|0|0)	0 (9|0|0)	0 (5|0|0)	0 (2|0|0)	0 (2|0|0)	0 (2|0|0)	0 (1|0|0)	0 (1|0|0)	0 (1|0|0)	0 (1|0|0)
4	49664852	C	T	0 (288|0|0)	0.0775 (120|22|0)	0 (121|0|0)	0.1104 (60|17|0)	0 (61|0|0)	0.0169 (57|2|0)	0.0147 (33|1|0)	0.0152 (32|1|0)	0.0156 (31|1|0)	0 (31|0|0)	0 (30|0|0)	0.069 (25|4|0)	0 (28|0|0)	0.0179 (27|1|0)	0 (25|0|0)	0 (24|0|0)	0 (23|0|0)	0 (17|0|0)	0 (16|0|0)	0.2333 (10|3|2)	0 (10|0|0)	0 (9|0|0)	0 (5|0|0)	0 (2|0|0)	0 (2|0|0)	0 (2|0|0)	0 (1|0|0)	0 (1|0|0)	0 (1|0|0)	0 (1|0|0)
5	49667361	C	T	0 (288|0|0)	0.0775 (120|22|0)	0 (121|0|0)	0.1104 (60|17|0)	0 (61|0|0)	0.0169 (57|2|0)	0.0147 (33|1|0)	0.0152 (32|1|0)	0.0156 (31|1|0)	0 (31|0|0)	0 (30|0|0)	0.069 (25|4|0)	0 (28|0|0)	0.0179 (27|1|0)	0 (25|0|0)	0 (24|0|0)	0 (23|0|0)	0 (17|0|0)	0 (16|0|0)	0.2333 (10|3|2)	0 (10|0|0)	0 (9|0|0)	0 (5|0|0)	0 (2|0|0)	0 (2|0|0)	0 (2|0|0)	0 (1|0|0)	0 (1|0|0)	0 (1|0|0)	0 (1|0|0)
6	49673503	C	T	0.0017 (287|1|0)	0.088 (117|25|0)	0 (121|0|0)	0.1558 (53|24|0)	0 (61|0|0)	0.0169 (57|2|0)	0.0147 (33|1|0)	0 (33|0|0)	0.0469 (29|3|0)	0 (31|0|0)	0 (30|0|0)	0.069 (25|4|0)	0 (28|0|0)	0.0179 (27|1|0)	0 (25|0|0)	0 (24|0|0)	0.0217 (22|1|0)	0 (17|0|0)	0 (16|0|0)	0.2333 (10|3|2)	0 (10|0|0)	0.0556 (8|1|0)	0 (5|0|0)	0 (2|0|0)	0 (2|0|0)	0 (2|0|0)	0 (1|0|0)	0 (1|0|0)	0 (1|0|0)	0 (1|0|0)
7	49681169	T	C	0.0017 (287|1|0)	0.088 (117|25|0)	0 (121|0|0)	0.1558 (53|24|0)	0 (61|0|0)	0.0169 (57|2|0)	0.0147 (33|1|0)	0 (33|0|0)	0.0469 (29|3|0)	0 (31|0|0)	0 (30|0|0)	0.069 (25|4|0)	0 (28|0|0)	0.0179 (27|1|0)	0 (25|0|0)	0 (24|0|0)	0.0217 (22|1|0)	0 (17|0|0)	0 (16|0|0)	0.2333 (10|3|2)	0 (10|0|0)	0.0556 (8|1|0)	0 (5|0|0)	0 (2|0|0)	0 (2|0|0)	0 (2|0|0)	0 (1|0|0)	0 (1|0|0)	0 (1|0|0)	0 (1|0|0)
8	49682552	A	G	0.0017 (287|1|0)	0.088 (117|25|0)	0 (121|0|0)	0.1558 (53|24|0)	0 (61|0|0)	0.0169 (57|2|0)	0.0147 (33|1|0)	0 (33|0|0)	0.0469 (29|3|0)	0 (31|0|0)	0 (30|0|0)	0.069 (25|4|0)	0 (28|0|0)	0.0179 (27|1|0)	0 (25|0|0)	0 (24|0|0)	0.0217 (22|1|0)	0 (17|0|0)	0 (16|0|0)	0.2333 (10|3|2)	0 (10|0|0)	0.0556 (8|1|0)	0 (5|0|0)	0 (2|0|0)	0 (2|0|0)	0 (2|0|0)	0 (1|0|0)	0 (1|0|0)	0 (1|0|0)	0 (1|0|0)
9	49686038	A	G	0.0017 (287|1|0)	0.088 (117|25|0)	0 (121|0|0)	0.1558 (53|24|0)	0 (61|0|0)	0.0169 (57|2|0)	0.0147 (33|1|0)	0.0152 (32|1|0)	0.0469 (29|3|0)	0 (31|0|0)	0 (30|0|0)	0.069 (25|4|0)	0 (28|0|0)	0.0179 (27|1|0)	0 (25|0|0)	0 (24|0|0)	0.0217 (22|1|0)	0 (17|0|0)	0 (16|0|0)	0.2333 (10|3|2)	0 (10|0|0)	0.0556 (8|1|0)	0 (5|0|0)	0 (2|0|0)	0 (2|0|0)	0 (2|0|0)	0 (1|0|0)	0 (1|0|0)	0 (1|0|0)	0 (1|0|0)
10	49687224	T	G	0.0017 (287|1|0)	0.088 (117|25|0)	0 (121|0|0)	0.1558 (53|24|0)	0 (61|0|0)	0.0169 (57|2|0)	0.0147 (33|1|0)	0 (33|0|0)	0.0469 (29|3|0)	0 (31|0|0)	0 (30|0|0)	0.069 (25|4|0)	0 (28|0|0)	0.0179 (27|1|0)	0 (25|0|0)	0 (24|0|0)	0.0217 (22|1|0)	0 (17|0|0)	0 (16|0|0)	0.2333 (10|3|2)	0 (10|0|0)	0.0556 (8|1|0)	0 (5|0|0)	0 (2|0|0)	0 (2|0|0)	0 (2|0|0)	0 (1|0|0)	0 (1|0|0)	0 (1|0|0)	0 (1|0|0)
11	49687585	C	T	0.0017 (287|1|0)	0.088 (117|25|0)	0 (121|0|0)	0.1558 (53|24|0)	0 (61|0|0)	0.0169 (57|2|0)	0.0147 (33|1|0)	0 (33|0|0)	0.0469 (29|3|0)	0 (31|0|0)	0 (30|0|0)	0.069 (25|4|0)	0 (28|0|0)	0.0179 (27|1|0)	0 (25|0|0)	0 (24|0|0)	0.0217 (22|1|0)	0 (17|0|0)	0 (16|0|0)	0.2333 (10|3|2)	0 (10|0|0)	0.0556 (8|1|0)	0 (5|0|0)	0 (2|0|0)	0 (2|0|0)	0 (2|0|0)	0 (1|0|0)	0 (1|0|0)	0 (1|0|0)	0 (1|0|0)
12	49691015	G	T	0.0017 (287|1|0)	0.0845 (118|24|0)	0 (121|0|0)	0.1494 (54|23|0)	0 (61|0|0)	0.0169 (57|2|0)	0.0147 (33|1|0)	0.0152 (32|1|0)	0.0469 (29|3|0)	0 (31|0|0)	0 (30|0|0)	0.069 (25|4|0)	0 (28|0|0)	0.0179 (27|1|0)	0 (25|0|0)	0 (24|0|0)	0.0217 (22|1|0)	0 (17|0|0)	0 (16|0|0)	0.2333 (10|3|2)	0 (10|0|0)	0.0556 (8|1|0)	0 (5|0|0)	0 (2|0|0)	0 (2|0|0)	0 (2|0|0)	0 (1|0|0)	0 (1|0|0)	0 (1|0|0)	0 (1|0|0)
13	49692015	T	C	0.0017 (287|1|0)	0.088 (117|25|0)	0 (121|0|0)	0.1558 (53|24|0)	0 (61|0|0)	0.0169 (57|2|0)	0.0147 (33|1|0)	0.0152 (32|1|0)	0.0469 (29|3|0)	0 (31|0|0)	0 (30|0|0)	0.069 (25|4|0)	0 (28|0|0)	0.0179 (27|1|0)	0 (25|0|0)	0 (24|0|0)	0.0217 (22|1|0)	0 (17|0|0)	0 (16|0|0)	0.2333 (10|3|2)	0 (10|0|0)	0.0556 (8|1|0)	0 (5|0|0)	0 (2|0|0)	0 (2|0|0)	0 (2|0|0)	0 (1|0|0)	0 (1|0|0)	0 (1|0|0)	0 (1|0|0)
14	49692485	G	T	0.0017 (287|1|0)	0.088 (117|25|0)	0 (121|0|0)	0.1558 (53|24|0)	0 (61|0|0)	0.0169 (57|2|0)	0.0147 (33|1|0)	0.0152 (32|1|0)	0.0469 (29|3|0)	0 (31|0|0)	0 (30|0|0)	0.069 (25|4|0)	0 (28|0|0)	0.0179 (27|1|0)	0 (25|0|0)	0 (24|0|0)	0.0217 (22|1|0)	0 (17|0|0)	0 (16|0|0)	0.2333 (10|3|2)	0 (10|0|0)	0.0556 (8|1|0)	0 (5|0|0)	0 (2|0|0)	0 (2|0|0)	0 (2|0|0)	0 (1|0|0)	0 (1|0|0)	0 (1|0|0)	0 (1|0|0)
15	49692825	C	T	0.0017 (287|1|0)	0.088 (117|25|0)	0 (121|0|0)	0.1558 (53|24|0)	0 (61|0|0)	0.0169 (57|2|0)	0.0147 (33|1|0)	0.0152 (32|1|0)	0.0469 (29|3|0)	0 (31|0|0)	0 (30|0|0)	0.069 (25|4|0)	0 (28|0|0)	0.0179 (27|1|0)	0 (25|0|0)	0 (24|0|0)	0.0217 (22|1|0)	0 (17|0|0)	0 (16|0|0)	0.2333 (10|3|2)	0 (10|0|0)	0.0556 (8|1|0)	0 (5|0|0)	0 (2|0|0)	0 (2|0|0)	0 (2|0|0)	0 (1|0|0)	0 (1|0|0)	0 (1|0|0)	0 (1|0|0)
16	49693121	T	C	0.0017 (287|1|0)	0.088 (117|25|0)	0 (121|0|0)	0.1558 (53|24|0)	0 (61|0|0)	0.0169 (57|2|0)	0.0147 (33|1|0)	0.0152 (32|1|0)	0.0469 (29|3|0)	0 (31|0|0)	0 (30|0|0)	0.069 (25|4|0)	0 (28|0|0)	0.0179 (27|1|0)	0 (25|0|0)	0 (24|0|0)	0.0217 (22|1|0)	0 (17|0|0)	0 (16|0|0)	0.2333 (10|3|2)	0 (10|0|0)	0.0556 (8|1|0)	0 (5|0|0)	0 (2|0|0)	0 (2|0|0)	0 (2|0|0)	0 (1|0|0)	0 (1|0|0)	0 (1|0|0)	0 (1|0|0)
17	49693140	G	T	0.0017 (287|1|0)	0.088 (117|25|0)	0 (121|0|0)	0.1558 (53|24|0)	0 (61|0|0)	0.0169 (57|2|0)	0.0147 (33|1|0)	0.0152 (32|1|0)	0.0469 (29|3|0)	0 (31|0|0)	0 (30|0|0)	0.069 (25|4|0)	0 (28|0|0)	0.0179 (27|1|0)	0 (25|0|0)	0 (24|0|0)	0.0217 (22|1|0)	0 (17|0|0)	0 (16|0|0)	0.2333 (10|3|2)	0 (10|0|0)	0.0556 (8|1|0)	0 (5|0|0)	0 (2|0|0)	0 (2|0|0)	0 (2|0|0)	0 (1|0|0)	0 (1|0|0)	0 (1|0|0)	0 (1|0|0)
18	49693164	A	T	0.0017 (287|1|0)	0.088 (117|25|0)	0 (121|0|0)	0.1558 (53|24|0)	0 (61|0|0)	0.0169 (57|2|0)	0.0147 (33|1|0)	0.0152 (32|1|0)	0.0469 (29|3|0)	0 (31|0|0)	0 (30|0|0)	0.069 (25|4|0)	0 (28|0|0)	0.0179 (27|1|0)	0 (25|0|0)	0 (24|0|0)	0.0217 (22|1|0)	0 (17|0|0)	0 (16|0|0)	0.2333 (10|3|2)	0 (10|0|0)	0.0556 (8|1|0)	0 (5|0|0)	0 (2|0|0)	0 (2|0|0)	0 (2|0|0)	0 (1|0|0)	0 (1|0|0)	0 (1|0|0)	0 (1|0|0)
19	49693178	A	C	0.0017 (287|1|0)	0.088 (117|25|0)	0 (121|0|0)	0.1558 (53|24|0)	0 (61|0|0)	0.0169 (57|2|0)	0.0147 (33|1|0)	0.0152 (32|1|0)	0.0469 (29|3|0)	0 (31|0|0)	0 (30|0|0)	0.069 (25|4|0)	0 (28|0|0)	0.0179 (27|1|0)	0 (25|0|0)	0 (24|0|0)	0.0217 (22|1|0)	0 (17|0|0)	0 (16|0|0)	0.2333 (10|3|2)	0 (10|0|0)	0.0556 (8|1|0)	0 (5|0|0)	0 (2|0|0)	0 (2|0|0)	0 (2|0|0)	0 (1|0|0)	0 (1|0|0)	0 (1|0|0)	0 (1|0|0)
20	49693265	A	G	0.0017 (287|1|0)	0.088 (117|25|0)	0 (121|0|0)	0.1558 (53|24|0)	0 (61|0|0)	0.0169 (57|2|0)	0.0147 (33|1|0)	0.0152 (32|1|0)	0.0469 (29|3|0)	0 (31|0|0)	0 (30|0|0)	0.069 (25|4|0)	0 (28|0|0)	0.0179 (27|1|0)	0 (25|0|0)	0 (24|0|0)	0.0217 (22|1|0)	0 (17|0|0)	0 (16|0|0)	0.2333 (10|3|2)	0 (10|0|0)	0.0556 (8|1|0)	0 (5|0|0)	0 (2|0|0)	0 (2|0|0)	0 (2|0|0)	0 (1|0|0)	0 (1|0|0)	0 (1|0|0)	0 (1|0|0)
21	49693284	G	A	0.0017 (287|1|0)	0.088 (117|25|0)	0 (121|0|0)	0.1558 (53|24|0)	0 (61|0|0)	0.0169 (57|2|0)	0.0147 (33|1|0)	0.0152 (32|1|0)	0.0469 (29|3|0)	0 (31|0|0)	0 (30|0|0)	0.069 (25|4|0)	0 (28|0|0)	0.0179 (27|1|0)	0 (25|0|0)	0 (24|0|0)	0.0217 (22|1|0)	0 (17|0|0)	0 (16|0|0)	0.2333 (10|3|2)	0 (10|0|0)	0.0556 (8|1|0)	0 (5|0|0)	0 (2|0|0)	0 (2|0|0)	0 (2|0|0)	0 (1|0|0)	0 (1|0|0)	0 (1|0|0)	0 (1|0|0)
22	49693601	T	C	0.0017 (287|1|0)	0.088 (117|25|0)	0 (121|0|0)	0.1558 (53|24|0)	0 (61|0|0)	0.0169 (57|2|0)	0.0147 (33|1|0)	0.0152 (32|1|0)	0.0469 (29|3|0)	0 (31|0|0)	0 (30|0|0)	0.069 (25|4|0)	0 (28|0|0)	0.0179 (27|1|0)	0 (25|0|0)	0 (24|0|0)	0.0217 (22|1|0)	0 (17|0|0)	0 (16|0|0)	0.2333 (10|3|2)	0 (10|0|0)	0.0556 (8|1|0)	0 (5|0|0)	0 (2|0|0)	0 (2|0|0)	0 (2|0|0)	0 (1|0|0)	0 (1|0|0)	0 (1|0|0)	0 (1|0|0)
23	49693913	A	C	0.0017 (287|1|0)	0.088 (117|25|0)	0 (121|0|0)	0.1494 (54|23|0)	0 (61|0|0)	0.0169 (57|2|0)	0.0147 (33|1|0)	0.0152 (32|1|0)	0.0625 (28|4|0)	0 (31|0|0)	0 (30|0|0)	0.069 (25|4|0)	0 (28|0|0)	0.0179 (27|1|0)	0 (25|0|0)	0 (24|0|0)	0.0217 (22|1|0)	0 (17|0|0)	0 (16|0|0)	0.2333 (10|3|2)	0 (10|0|0)	0.0556 (8|1|0)	0 (5|0|0)	0 (2|0|0)	0 (2|0|0)	0 (2|0|0)	0 (1|0|0)	0 (1|0|0)	0 (1|0|0)	0 (1|0|0)
24	49694977	A	G	0.0017 (287|1|0)	0.088 (117|25|0)	0 (121|0|0)	0.1558 (53|24|0)	0 (61|0|0)	0.0169 (57|2|0)	0.0147 (33|1|0)	0.0152 (32|1|0)	0.0469 (29|3|0)	0 (31|0|0)	0 (30|0|0)	0.069 (25|4|0)	0 (28|0|0)	0.0179 (27|1|0)	0 (25|0|0)	0 (24|0|0)	0.0217 (22|1|0)	0 (17|0|0)	0 (16|0|0)	0.2333 (10|3|2)	0 (10|0|0)	0.0556 (8|1|0)	0 (5|0|0)	0 (2|0|0)	0 (2|0|0)	0 (2|0|0)	0 (1|0|0)	0 (1|0|0)	0 (1|0|0)	0 (1|0|0)
25	49695504	G	A	0.0017 (287|1|0)	0.088 (117|25|0)	0 (121|0|0)	0.1558 (53|24|0)	0 (61|0|0)	0.0169 (57|2|0)	0.0147 (33|1|0)	0.0152 (32|1|0)	0.0469 (29|3|0)	0 (31|0|0)	0 (30|0|0)	0.069 (25|4|0)	0 (28|0|0)	0.0179 (27|1|0)	0 (25|0|0)	0 (24|0|0)	0.0217 (22|1|0)	0 (17|0|0)	0 (16|0|0)	0.2333 (10|3|2)	0 (10|0|0)	0.0556 (8|1|0)	0 (5|0|0)	0 (2|0|0)	0 (2|0|0)	0 (2|0|0)	0 (1|0|0)	0 (1|0|0)	0 (1|0|0)	0 (1|0|0)
26	49695952	C	T	0.0017 (287|1|0)	0.088 (117|25|0)	0 (121|0|0)	0.1558 (53|24|0)	0 (61|0|0)	0.0169 (57|2|0)	0.0147 (33|1|0)	0.0152 (32|1|0)	0.0469 (29|3|0)	0 (31|0|0)	0 (30|0|0)	0.069 (25|4|0)	0 (28|0|0)	0.0179 (27|1|0)	0 (25|0|0)	0 (24|0|0)	0.0217 (22|1|0)	0 (17|0|0)	0 (16|0|0)	0.2333 (10|3|2)	0 (10|0|0)	0.0556 (8|1|0)	0 (5|0|0)	0 (2|0|0)	0 (2|0|0)	0 (2|0|0)	0 (1|0|0)	0 (1|0|0)	0 (1|0|0)	0 (1|0|0)
27	49698002	C	T	0.0017 (287|1|0)	0.0845 (118|24|0)	0 (121|0|0)	0.1558 (53|24|0)	0 (61|0|0)	0.0169 (57|2|0)	0.0147 (33|1|0)	0.0152 (32|1|0)	0.0312 (30|2|0)	0 (31|0|0)	0 (30|0|0)	0.069 (25|4|0)	0 (28|0|0)	0.0179 (27|1|0)	0 (25|0|0)	0 (24|0|0)	0.0217 (22|1|0)	0 (17|0|0)	0 (16|0|0)	0.2333 (10|3|2)	0 (10|0|0)	0.0556 (8|1|0)	0 (5|0|0)	0 (2|0|0)	0 (2|0|0)	0 (2|0|0)	0 (1|0|0)	0 (1|0|0)	0 (1|0|0)	0 (1|0|0)
28	49698436	C	T	0.0017 (287|1|0)	0.088 (117|25|0)	0 (121|0|0)	0.1558 (53|24|0)	0 (61|0|0)	0.0169 (57|2|0)	0.0147 (33|1|0)	0 (33|0|0)	0.0469 (29|3|0)	0 (31|0|0)	0 (30|0|0)	0.069 (25|4|0)	0 (28|0|0)	0.0179 (27|1|0)	0 (25|0|0)	0 (24|0|0)	0.0217 (22|1|0)	0 (17|0|0)	0 (16|0|0)	0.2333 (10|3|2)	0 (10|0|0)	0.0556 (8|1|0)	0 (5|0|0)	0 (2|0|0)	0 (2|0|0)	0 (2|0|0)	0 (1|0|0)	0 (1|0|0)	0 (1|0|0)	0 (1|0|0)
29	49700154	G	A	0.0017 (287|1|0)	0.088 (117|25|0)	0 (121|0|0)	0.1558 (53|24|0)	0 (61|0|0)	0.0169 (57|2|0)	0.0147 (33|1|0)	0.0152 (32|1|0)	0.0469 (29|3|0)	0 (31|0|0)	0 (30|0|0)	0.069 (25|4|0)	0 (28|0|0)	0.0179 (27|1|0)	0 (25|0|0)	0 (24|0|0)	0.0217 (22|1|0)	0 (17|0|0)	0 (16|0|0)	0.2333 (10|3|2)	0 (10|0|0)	0.0556 (8|1|0)	0 (5|0|0)	0 (2|0|0)	0 (2|0|0)	0 (2|0|0)	0 (1|0|0)	0 (1|0|0)	0 (1|0|0)	0 (1|0|0)
30	49701106	T	C	0.0017 (287|1|0)	0.088 (117|25|0)	0 (121|0|0)	0.1558 (53|24|0)	0 (61|0|0)	0.0169 (57|2|0)	0.0147 (33|1|0)	0.0152 (32|1|0)	0.0469 (29|3|0)	0 (31|0|0)	0 (30|0|0)	0.069 (25|4|0)	0 (28|0|0)	0.0179 (27|1|0)	0 (25|0|0)	0 (24|0|0)	0.0217 (22|1|0)	0 (17|0|0)	0 (16|0|0)	0.2333 (10|3|2)	0 (10|0|0)	0.0556 (8|1|0)	0 (5|0|0)	0 (2|0|0)	0 (2|0|0)	0 (2|0|0)	0 (1|0|0)	0 (1|0|0)	0 (1|0|0)	0 (1|0|0)
31	49702287	T	C	0.0017 (287|1|0)	0.088 (117|25|0)	0 (121|0|0)	0.1558 (53|24|0)	0 (61|0|0)	0.0169 (57|2|0)	0.0294 (32|2|0)	0.0152 (32|1|0)	0.0469 (29|3|0)	0 (31|0|0)	0 (30|0|0)	0.0862 (24|5|0)	0 (28|0|0)	0.0179 (27|1|0)	0 (25|0|0)	0 (24|0|0)	0.0217 (22|1|0)	0 (17|0|0)	0 (16|0|0)	0.2333 (10|3|2)	0 (10|0|0)	0.0556 (8|1|0)	0 (5|0|0)	0 (2|0|0)	0 (2|0|0)	0 (2|0|0)	0 (1|0|0)	0 (1|0|0)	0 (1|0|0)	0 (1|0|0)
32	49702494	G	A	not in the 1000BG data
33	49705951	A	G	0.0017 (287|1|0)	0.088 (117|25|0)	0 (121|0|0)	0.1558 (53|24|0)	0 (61|0|0)	0.0169 (57|2|0)	0.0294 (32|2|0)	0.0303 (31|2|0)	0.0469 (29|3|0)	0 (31|0|0)	0 (30|0|0)	0.0862 (24|5|0)	0 (28|0|0)	0.0179 (27|1|0)	0 (25|0|0)	0 (24|0|0)	0.0217 (22|1|0)	0 (17|0|0)	0 (16|0|0)	0.2333 (10|3|2)	0 (10|0|0)	0.0556 (8|1|0)	0 (5|0|0)	0 (2|0|0)	0 (2|0|0)	0 (2|0|0)	0 (1|0|0)	0 (1|0|0)	0 (1|0|0)	0 (1|0|0)
34	49706022	T	C	0.0017 (287|1|0)	0.088 (117|25|0)	0 (121|0|0)	0.1558 (53|24|0)	0 (61|0|0)	0.0169 (57|2|0)	0.0294 (32|2|0)	0.0152 (32|1|0)	0.0469 (29|3|0)	0 (31|0|0)	0 (30|0|0)	0.0862 (24|5|0)	0 (28|0|0)	0.0179 (27|1|0)	0 (25|0|0)	0 (24|0|0)	0.0217 (22|1|0)	0 (17|0|0)	0 (16|0|0)	0.2333 (10|3|2)	0 (10|0|0)	0.0556 (8|1|0)	0 (5|0|0)	0 (2|0|0)	0 (2|0|0)	0 (2|0|0)	0 (1|0|0)	0 (1|0|0)	0 (1|0|0)	0 (1|0|0)
35	49708283	T	C	0.0017 (287|1|0)	0.088 (117|25|0)	0 (121|0|0)	0.1558 (53|24|0)	0 (61|0|0)	0.0169 (57|2|0)	0.0294 (32|2|0)	0 (33|0|0)	0.0469 (29|3|0)	0 (31|0|0)	0 (30|0|0)	0.0862 (24|5|0)	0 (28|0|0)	0.0179 (27|1|0)	0 (25|0|0)	0 (24|0|0)	0.0217 (22|1|0)	0 (17|0|0)	0 (16|0|0)	0.2333 (10|3|2)	0 (10|0|0)	0.0556 (8|1|0)	0 (5|0|0)	0 (2|0|0)	0 (2|0|0)	0 (2|0|0)	0 (1|0|0)	0 (1|0|0)	0 (1|0|0)	0 (1|0|0)
36	49715678	C	T	0.0017 (287|1|0)	0.088 (117|25|0)	0 (121|0|0)	0.1558 (53|24|0)	0 (61|0|0)	0.0169 (57|2|0)	0.0294 (32|2|0)	0.0152 (32|1|0)	0.0469 (29|3|0)	0 (31|0|0)	0 (30|0|0)	0.0862 (24|5|0)	0 (28|0|0)	0.0179 (27|1|0)	0 (25|0|0)	0 (24|0|0)	0.0217 (22|1|0)	0 (17|0|0)	0 (16|0|0)	0.2333 (10|3|2)	0 (10|0|0)	0.0556 (8|1|0)	0 (5|0|0)	0 (2|0|0)	0 (2|0|0)	0 (2|0|0)	0 (1|0|0)	0 (1|0|0)	0 (1|0|0)	0 (1|0|0)
37	49718641	C	T	0.0017 (287|1|0)	0.088 (117|25|0)	0 (121|0|0)	0.1558 (53|24|0)	0 (61|0|0)	0.0169 (57|2|0)	0.0294 (32|2|0)	0.0152 (32|1|0)	0.0469 (29|3|0)	0 (31|0|0)	0 (30|0|0)	0.0862 (24|5|0)	0 (28|0|0)	0.0179 (27|1|0)	0 (25|0|0)	0 (24|0|0)	0.0217 (22|1|0)	0 (17|0|0)	0 (16|0|0)	0.2333 (10|3|2)	0 (10|0|0)	0.0556 (8|1|0)	0 (5|0|0)	0 (2|0|0)	0 (2|0|0)	0 (2|0|0)	0 (1|0|0)	0 (1|0|0)	0 (1|0|0)	0 (1|0|0)
38	49878773	C	T	0 (288|0|0)	0 (142|0|0)	0 (121|0|0)	0 (77|0|0)	0 (61|0|0)	0.0169 (57|2|0)	0 (34|0|0)	0 (33|0|0)	0 (32|0|0)	0 (31|0|0)	0 (30|0|0)	0 (29|0|0)	0 (28|0|0)	0 (28|0|0)	0 (25|0|0)	0 (24|0|0)	0 (23|0|0)	0 (17|0|0)	0 (16|0|0)	0 (15|0|0)	0 (10|0|0)	0 (9|0|0)	0 (5|0|0)	0 (2|0|0)	0 (2|0|0)	0 (2|0|0)	0 (1|0|0)	0 (1|0|0)	0 (1|0|0)	0 (1|0|0)
39	50481151	A	G	0 (288|0|0)	0.0775 (120|22|0)	0 (121|0|0)	0.1169 (59|18|0)	0 (61|0|0)	0.0254 (56|3|0)	0.0294 (32|2|0)	0 (33|0|0)	0 (32|0|0)	0 (31|0|0)	0 (30|0|0)	0.069 (25|4|0)	0 (28|0|0)	0.0179 (27|1|0)	0 (25|0|0)	0 (24|0|0)	0.0217 (22|1|0)	0 (17|0|0)	0 (16|0|0)	0 (15|0|0)	0 (10|0|0)	0.0556 (8|1|0)	0 (5|0|0)	0 (2|0|0)	0 (2|0|0)	0 (2|0|0)	0 (1|0|0)	0 (1|0|0)	0 (1|0|0)	0 (1|0|0)
40	50858538	G	A	0 (288|0|0)	0 (142|0|0)	0 (121|0|0)	0 (77|0|0)	0 (61|0|0)	0.0169 (57|2|0)	0 (34|0|0)	0 (33|0|0)	0 (32|0|0)	0 (31|0|0)	0 (30|0|0)	0 (29|0|0)	0 (28|0|0)	0 (28|0|0)	0 (25|0|0)	0 (24|0|0)	0 (23|0|0)	0 (17|0|0)	0 (16|0|0)	0 (15|0|0)	0 (10|0|0)	0 (9|0|0)	0 (5|0|0)	0 (2|0|0)	0 (2|0|0)	0 (2|0|0)	0 (1|0|0)	0 (1|0|0)	0 (1|0|0)	0 (1|0|0)
41	50929556	A	G	0 (288|0|0)	0 (142|0|0)	0 (121|0|0)	0 (77|0|0)	0 (61|0|0)	0.0169 (57|2|0)	0 (34|0|0)	0 (33|0|0)	0 (32|0|0)	0 (31|0|0)	0 (30|0|0)	0.0172 (28|1|0)	0 (28|0|0)	0 (28|0|0)	0 (25|0|0)	0 (24|0|0)	0 (23|0|0)	0 (17|0|0)	0 (16|0|0)	0 (15|0|0)	0 (10|0|0)	0 (9|0|0)	0 (5|0|0)	0 (2|0|0)	0 (2|0|0)	0 (2|0|0)	0 (1|0|0)	0 (1|0|0)	0 (1|0|0)	0 (1|0|0)
aHOL: Holstein, FV: Fleckvieh, ANG:Angus, SIM: Simmental, JER: Jersey, BSW: Brown Swiss, GV: Gelbvieh, CHA: Charolais, LIM: Limousin, HER: Hereford, GCOM: Guelph Composite, BBO: Beef Booster, ACO: Alberta Composite, MON: Montbéliarde, AYR: Ayrshire, NOR: Normande, RED: Red Holstein, ANG_R: Red Angus, RDC: Red Dairy Cattle, DANR: Danish Red, BBL: Belgian Blue, COM: Composite, PIE: Piedmonteser, ER…
